# Supplementary material
Source: ML conference proceedings conference paper supplement (https://openaccess.thecvf.com/content/ICCV_2019/html/Nunes_Online_Unsupervised_Learning_ICCV_2019_paper.html)
Supplement: Supplementary file 1 [file Nunes_Online_Unsupervised_Learning_ICCV_2019_supplemental.zip › readme.txt]

Video: http://www.imperial.ac.uk/personal-robotics/videos/
Code: http://www.imperial.ac.uk/personal-robotics/software/
